# Supplementary material
Source: PubMed Central journal article supplement (PMC7240651)
Supplement: jamacardiol-5-881-s001.pdf [file jamacardiol-5-881-s001.pdf]

## Supplementary Online Content

Bainey KR, Engstrom T, Smits PC, et al. Complete vs culprit-lesion-only revascularization for ST-segment elevation myocardial infarction: a systematic review and meta-analysis. *JAMA Cardiol*. Published online May 20, 2020. doi:10.1001/jamacardio.2020.1251

**eTable.** Search Strategy Used for MEDLINE

**eFigure 1.** PRISMA 2009 Flow Diagram

**eFigure 2.** Funnel Plot for CV Death

**eFigure 3.** Funnel Plot for CV Death or New Myocardial Infarction

**eFigure 4.** Forest Plot of Long-term All-Cause Mortality With Multivessel or Culprit-Lesion-Only Percutaneous Coronary Intervention

**eFigure 5.** Forest Plot of Long-term Recurrent Myocardial Infarction With Multivessel or Culprit-Lesion-Only Percutaneous Coronary Intervention

**eFigure 6.** Forest Plot of Long-term Recurrent Myocardial Infarction With Multivessel or Culprit-Lesion-Only Percutaneous Coronary Intervention Stratified by Multivessel Strategy

**eFigure 7.** Forest Plot of Long-term Cardiovascular Death or New Myocardial Infarction Stratified by Timing of Nonculprit Percutaneous Coronary Intervention

**eFigure 8.** Forest Plot of Long-term Cardiovascular Death Stratified by Timing of Nonculprit Percutaneous Coronary Intervention

**eFigure 9.** Forest Plot of Long-term Myocardial Infarction Stratified by Timing of Nonculprit Percutaneous Coronary Intervention

**eFigure 10.** Forest Plot of Cardiovascular Death in Patients With Multivessel or Culprit-Lesion-Only Percutaneous Coronary Intervention Including the CULPRIT SHOCK Trial

This supplementary material has been provided by the authors to give readers additional information about their work.

eTable. Search Strategy Used for MEDLINE

| Database | Search Strategy                                             |
|----------|-------------------------------------------------------------|
| 1.       | st elevation myocardial infarction.mp.                      |
| 2.       | st-elevation myocardial infarction.mp.                      |
| 3.       | ST segment elevation myocardial infarction.mp.              |
| 4.       | ST-segment elevation myocardial infarction.mp.              |
| 5.       | Myocardial Infarction/                                      |
| 6.       | 1 or 2 or 3 or 4 or 5                                       |
| 7.       | complete revascularization.mp.                              |
| 8.       | complete revascularisation.mp.                              |
| 9.       | multi-vessel revascularization.mp.                          |
| 10.      | multi-vessel revascularisation.mp.                          |
| 11.      | multi vessel revascularization.mp.                          |
| 12.      | multi vessel revascularisation.mp.                          |
| 13.      | multivessel revascularization.mp.                           |
| 14.      | multivessel revascularisation.mp.                           |
| 15.      | non culprit coronary artery.mp.                             |
| 16.      | non-culprit coronary artery.mp.                             |
| 17.      | nonculprit coronary artery.mp.                              |
| 18.      | 7 or 8 or 9 or 10 or 11 or 12 or 13 or 14 or 15 or 16 or 17 |
| 19.      | 6 and 18                                                    |

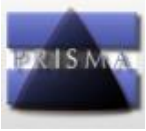

**eFigure 1. PRISMA 2009 Flow Diagram**

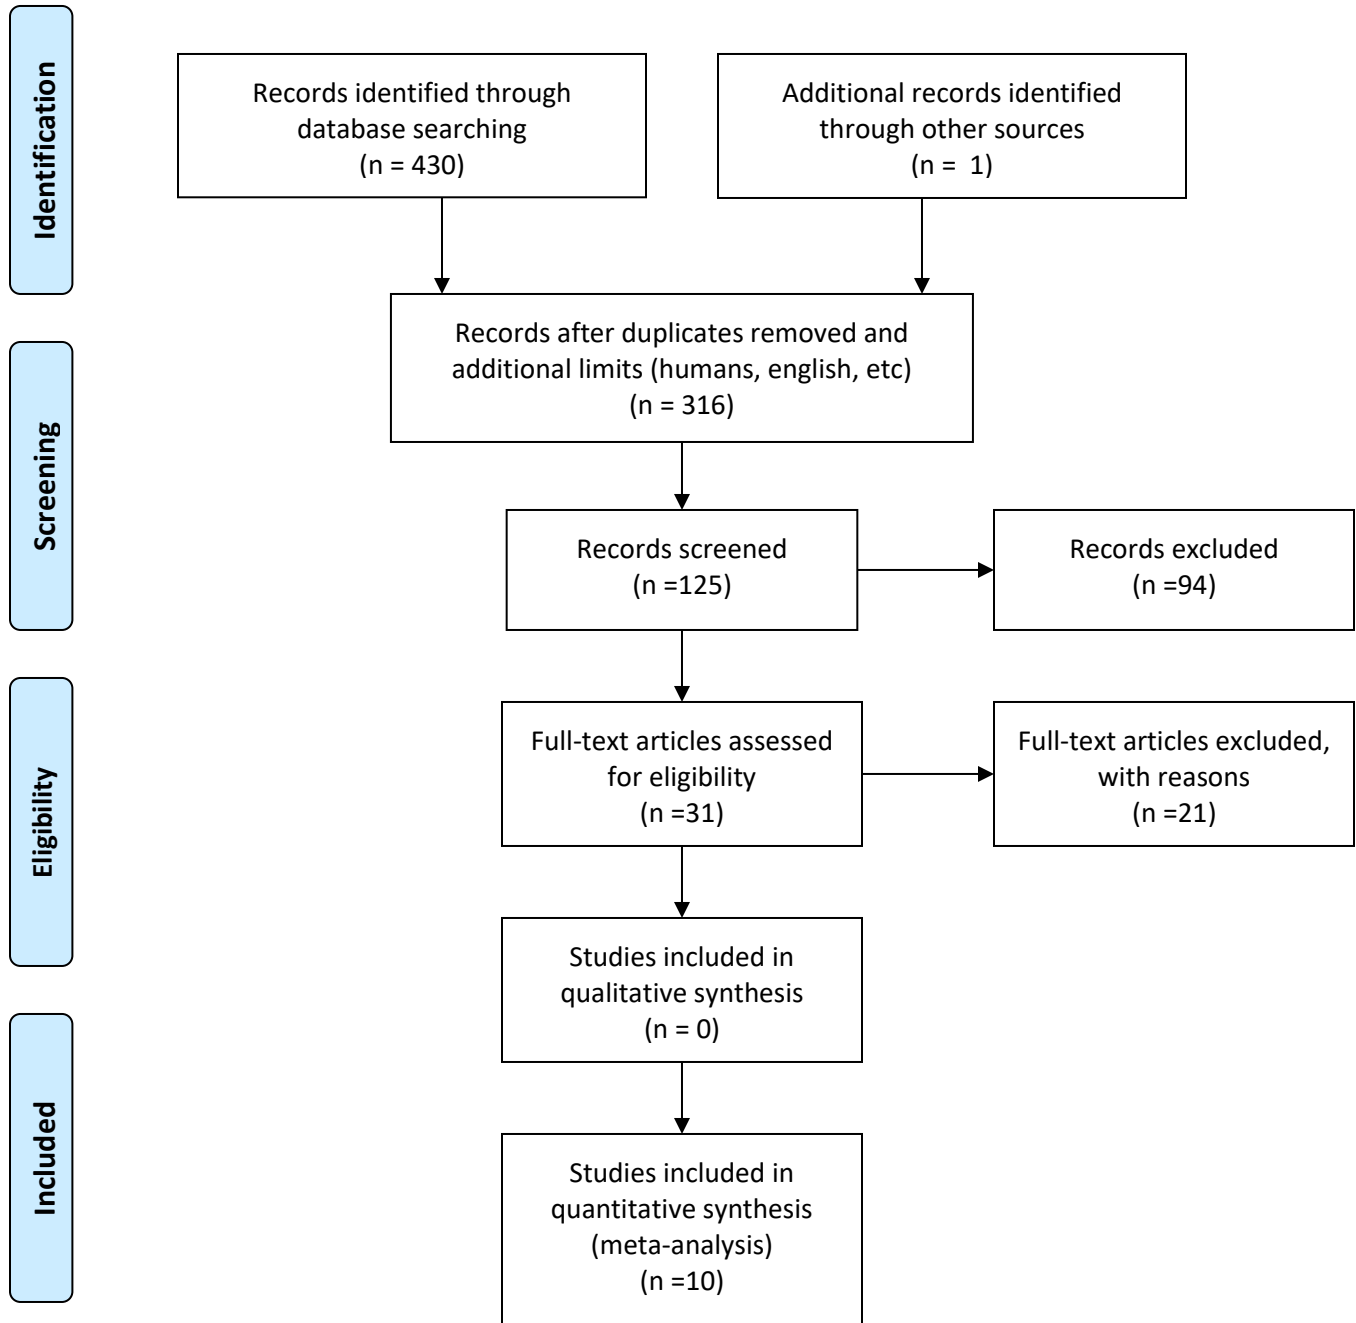

eFigure 2. Funnel Plot for CV Death

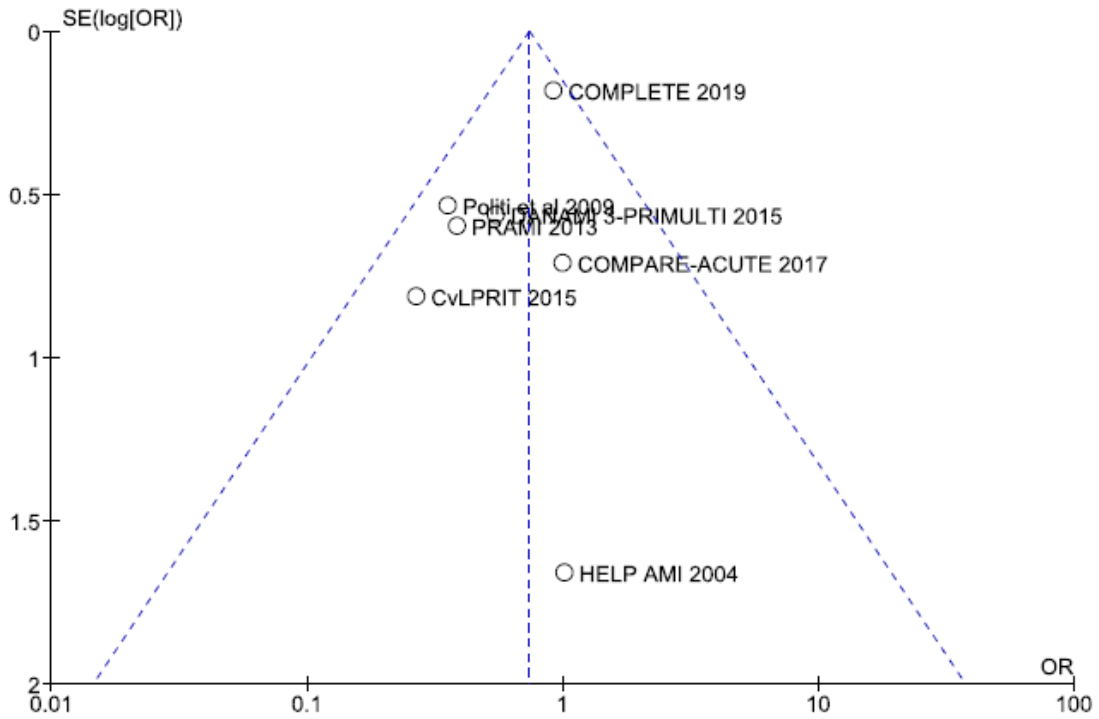

A scatter plot of the intervention effect estimates on the horizontal scale and the measure of study size on the vertical scale show a plot resembling a symmetrical (inverted) funnel indicating the absence of publication bias (Egger plot).

eFigure 3. Funnel Plot for CV Death or New Myocardial Infarction

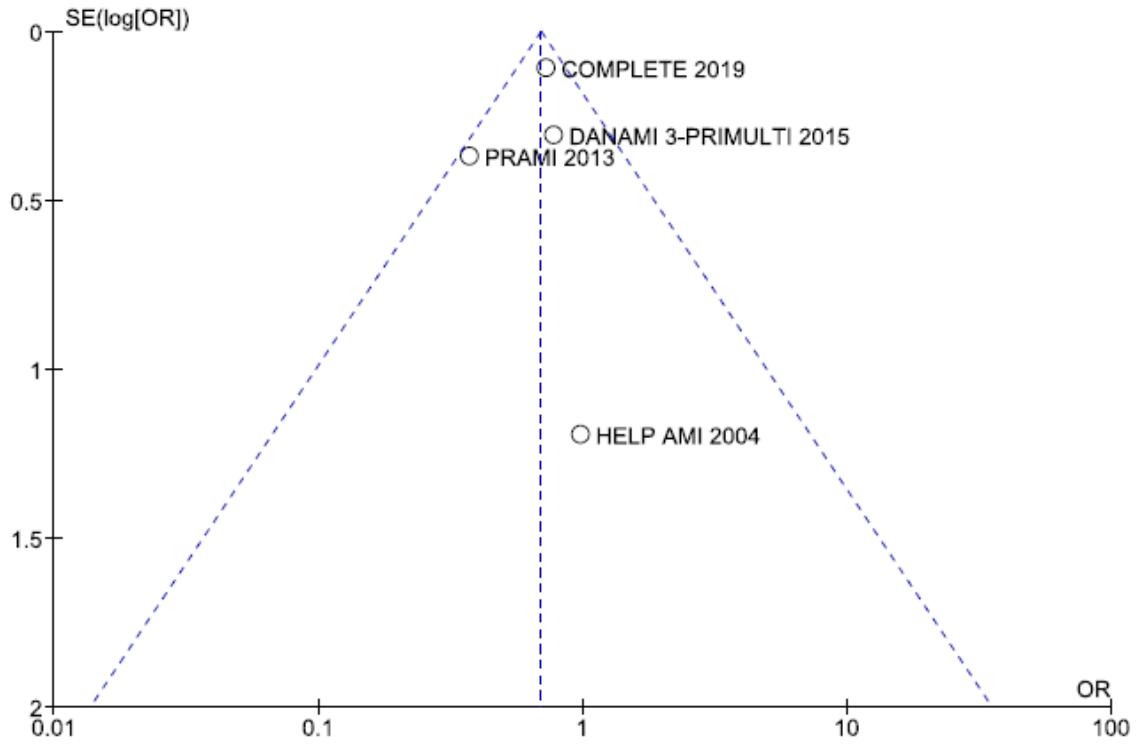

A scatter plot of the intervention effect estimates on the horizontal scale and the measure of study size on the vertical scale show a plot resembling a symmetrical (inverted) funnel indicating the absence of publication bias (Egger plot).

eFigure 4. Forest Plot of Long-term All-Cause Mortality With Multivessel or Culprit-Lesion-Only Percutaneous Coronary Intervention

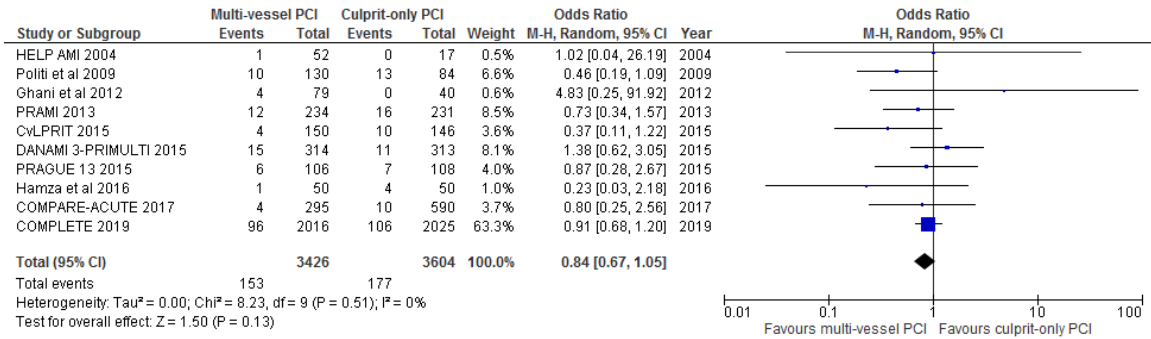

Squares and diamonds=odds ratios. Lines=95% confidence intervals.

eFigure 5. Forest Plot of Long-term Recurrent Myocardial Infarction With Multivessel or Culprit-Lesion-Only Percutaneous Coronary Intervention

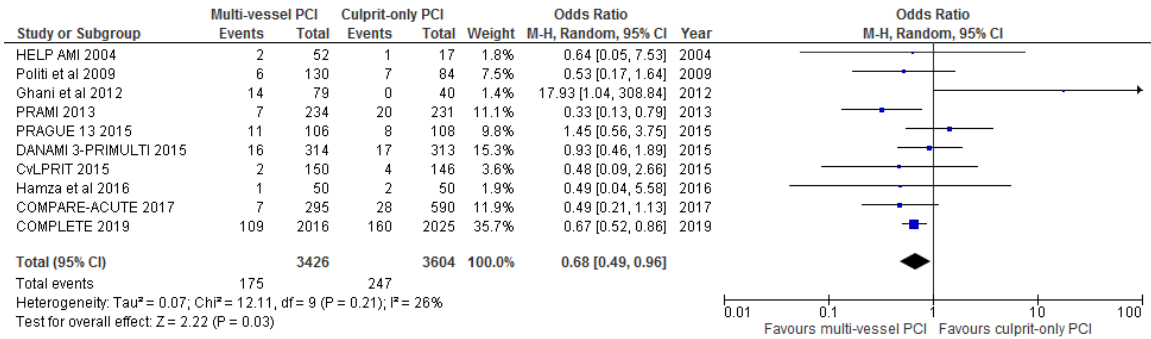

Squares and diamonds=odds ratios. Lines=95% confidence intervals.

eFigure 6. Forest Plot of Long-term Recurrent Myocardial Infarction With Multivessel or Culprit-Lesion-Only Percutaneous Coronary Intervention Stratified by Multivessel Strategy

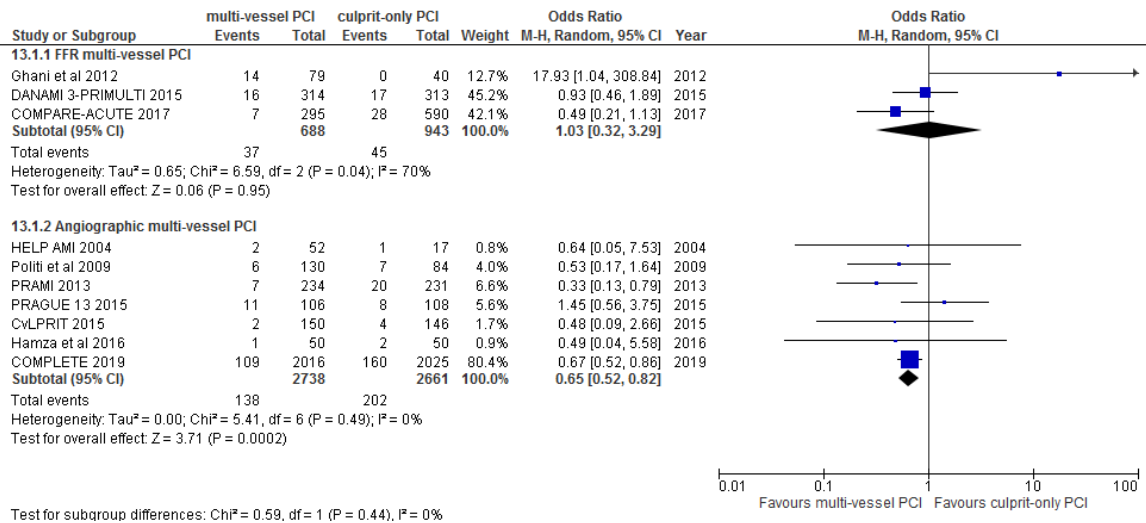

Squares and diamonds=odds ratios. Lines=95% confidence intervals.



eFigure 7. Forest Plot of Long-term Cardiovascular Death or New Myocardial Infarction Stratified by Timing of Nonculprit Percutaneous Coronary Intervention

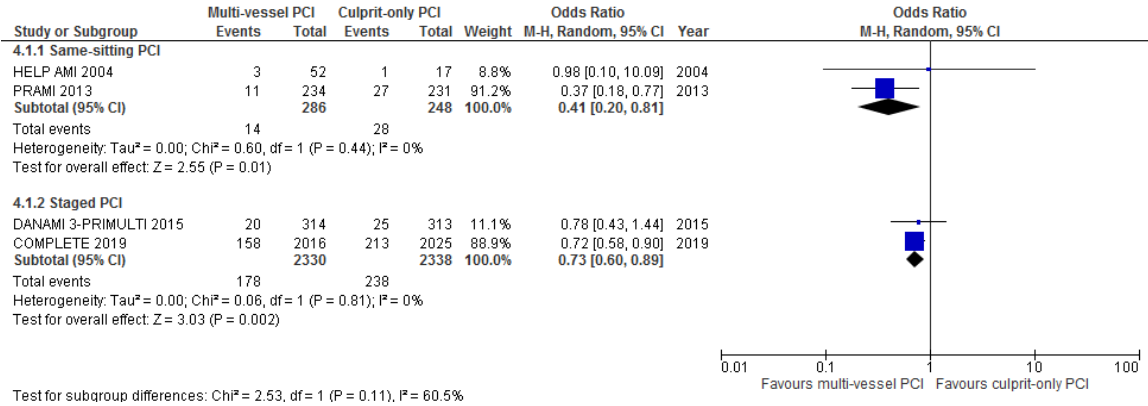

Squares and diamonds=odds ratios. Lines=95% confidence intervals.

eFigure 8. Forest Plot of Long-term Cardiovascular Death Stratified by Timing of Nonculprit Percutaneous Coronary Intervention

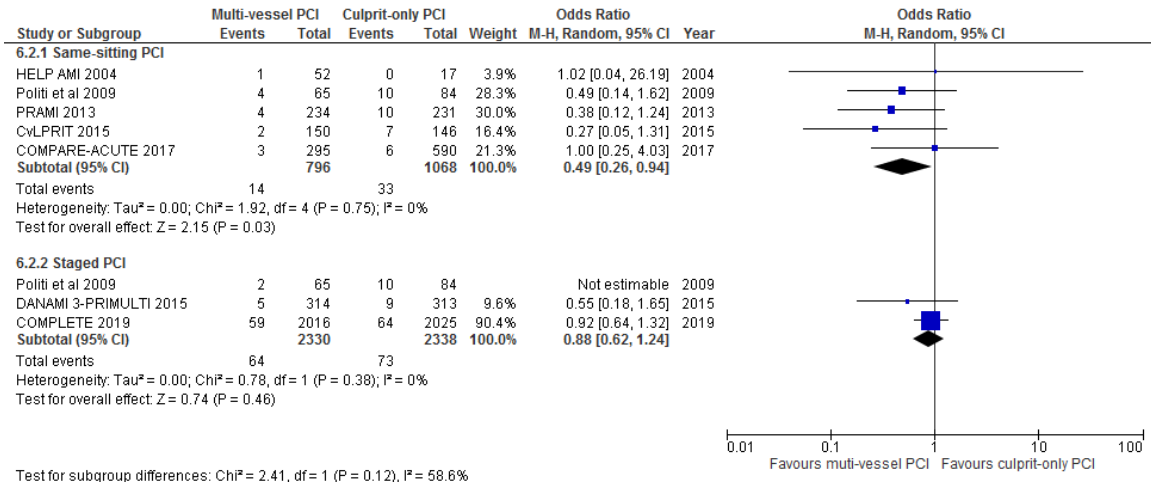

Squares and diamonds=odds ratios. Lines=95% confidence intervals.

eFigure 9. Forest Plot of Long-term Myocardial Infarction Stratified by Timing of Nonculprit Percutaneous Coronary Intervention

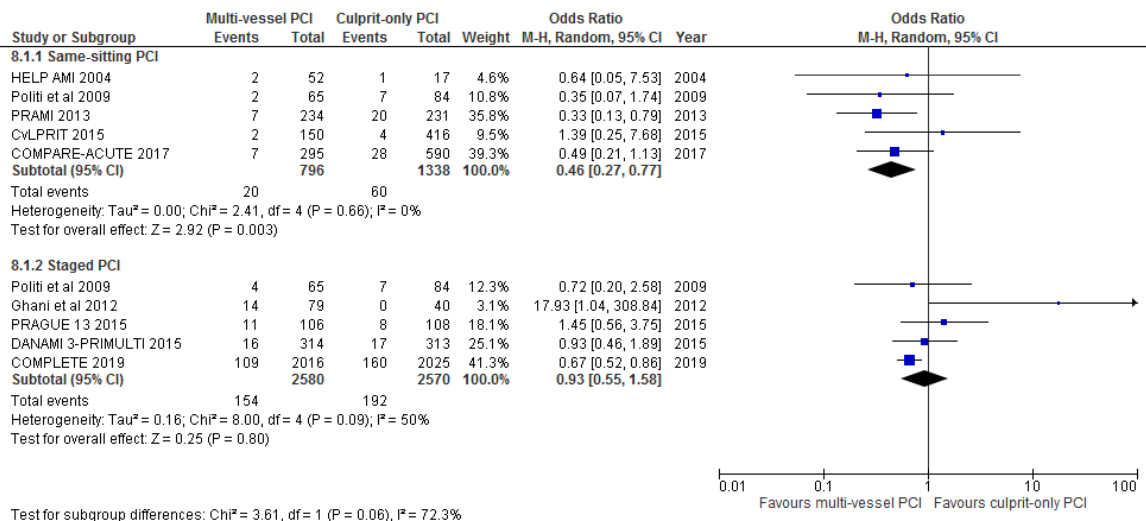

Squares and diamonds=odds ratios. Lines=95% confidence intervals.

eFigure 10. Forest Plot of Cardiovascular Death in Patients With Multivessel or Culprit-Lesion-Only Percutaneous Coronary Intervention Including the CULPRIT SHOCK Trial

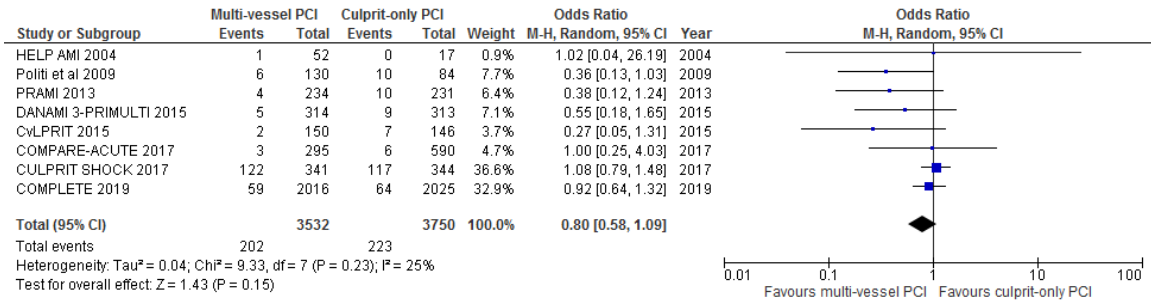

Squares and diamonds=odds ratios. Lines=95% confidence intervals
